# Supplementary material for: Meta-Analysis of Drosophila Circadian Microarray Studies Identifies a Novel Set of Rhythmically Expressed Genes
Source: PLoS Comput Biol. 2007 Nov 2;3(11):e208. doi: 10.1371/journal.pcbi.0030208 (PMC2098839; doi:10.1371/journal.pcbi.0030208)
Supplement: Table S5 — (13 KB DOC) [file pcbi.0030208.st005.xls]

## Sheet: Sheet1
RT-PCR Oligos
Target Gene	5' Forward Primer 3'	5' Reverse Primer 3'
tim	CTGGGGAGTGACCATGG	GCTGGAATCGCCACTG
per	CAGCAGCAGCCTAATCG	GAGTCGGACACCTTGG
clock	TACTGCGTGAGGATATCG	GTTGTTGTTCTGGTTGC
vri	CTTTTTCAAAGCGGCTGCAA	CTTTTTCAAAGCGGCTGCAA
kraken	CTTTTTCAAAGCGGCTGCAA	TTGTCCTGCCAGCCGTGCA
CG17100	CCCTATTGGAACGAGACGAA	GGCATATTCAGCATCGTCCT
CG8008	TCGATGGAGTGATGACAGTGA	GGTCACCACCGACAGGCGAA
