# Supplementary material for: Meta-Analysis of Drosophila Circadian Microarray Studies Identifies a Novel Set of Rhythmically Expressed Genes
Source: PLoS Comput Biol. 2007 Nov 2;3(11):e208. doi: 10.1371/journal.pcbi.0030208 (PMC2098839; doi:10.1371/journal.pcbi.0030208)
Supplement: Table S6 — Comparison between the LD meta-dataset and the list of transcripts identified in each of the original reports. It contains the number and identity (as Affymetrix probe set ID) of all transcripts found in common between the LD meta-dataset and each original set. (152 KB DOC) [file pcbi.0030208.st006.xls]

## Sheet: Sheet1
Meta set	Affymetrix	Gene	Gene Symbol	Gene	GenBank	FlyBase	Lin	Affymetrix	Gene	Gene Symbol	Gene	GenBank	FlyBase	Lin in common with meta set 27	Affymetrix	Gene	Gene Symbol	Gene	GenBank	FlyBase	Claridge-Chang	Affymetrix	Gene	Gene Symbol	Gene	GenBank	FlyBase	Claridge-Chang in common with meta set 38							Ceriani	Affymetrix	Gene	Gene Symbol	Gene	GenBank	FlyBase	Ceriani in common with meta set 31	Affymetrix	Gene	Gene Symbol	Gene	GenBank	FlyBase	McDonald
	Probe Set ID	Name	or CG #	CT #	Accession Number	Accession Number		Probe Set ID	Name	or CG #	CT #	Accession Number	Accession Number		Probe Set ID	Name	or CG #	CT #	Accession Number	Accession Number		Probe Set ID	Name	or CG #	CT #	Accession Number	Accession Number		Affymetrix	Gene	Gene Symbol	Gene	GenBank	FlyBase		Probe Set ID	Name	or CG #	CT #	Accession Number	Accession Number		Probe Set ID	Name	or CG #	CT #	Accession Number	Accession Number
214							72														159								Probe Set ID	Name	or CG #	CT #	Accession Number	Accession Number	116														134
1	141237_at		CG9705	CT27440	AE003526	FBgn0036661	1	151681_at		CG12790	CT37283		FBgn0035342	1	141248_at		CG5031	CT16138	AE003533	FBgn0036435	1	141237_at		CG9705	CT27440	AE003526	FBgn0036661	1	141237_at		CG9705	CT27440	AE003526	FBgn0036661	1	145778_at		CG15630	CT35785	AE003575	FBgn0031627	1	143606_at	Cytochrome P45-18a1	Cyp18a1	CT20826	AE003509	FBgn0010383	1
2	141248_at		CG5031	CT16138	AE003533	FBgn0036435	2	151871_at		BcDNA:GH02712	CT6764	AE003840	FBgn0027604	2	147202_at		CG17386	CT33484	AE003814	FBgn0033936	2	141313_at		EG:34F3.7	CT21087	AE003418	FBgn0025618	2	143606_at	Cytochrome P45-18a1	Cyp18a1	CT20826	AE003509	FBgn0010383	2	151634_at	Transportin	Trn	CT22759		FBgn0024921	2	147202_at		CG17386	CT33484	AE003814	FBgn0033936	2
3	141658_at		CG5853	CT18369	AE003626	FBgn0032167	3	152813_at		CG9497	CT26894	AE003613	FBgn0031800	3	149615_at		CG3940	CT13118	AE003685	FBgn0037788	3	141326_at	A kinase anchor protein 2	Akap200	CT32734	AE003621	FBgn0027932	3	147202_at		CG17386	CT33484	AE003814	FBgn0033936	3	152883_at		CG3330	CT11167	AE003760	FBgn0039511	3	148418_at		CG13305	CT32600	AE003554	FBgn0035921	3
4	141795_at		CG13644	CT33039	AE003749	FBgn0039247	4	153433_at	Photoreceptor dehydrogenase	Pdh	CT15746	AE003527	FBgn0011693	4	152597_at		SP2523	CT14058	AE003558	FBgn0035808	4	141342_at		CG6145	CT19307	AE003818	FBgn0033853	4	148418_at		CG13305	CT32600	AE003554	FBgn0035921	4	151795_at		CG7176	CT22171	AE003555	FBgn0035881	4	153092_at		Chd64	CT34849	AE003480	FBgn0035499	4
5	143606_at	Cytochrome P45-18a1	Cyp18a1	CT20826	AE003509	FBgn0010383	5	151791_at		CG3427	CT11533	AE003789	FBgn0033102	5	141593_at		CG5798	CT18196	AE003733	FBgn0038862	5	141360_at		CG9701	CT27420	AE003526	FBgn0036659	5	152308_at		CG10433	CT29298	AE003454	FBgn0034638	5	152083_at		CG15093	CT34968	AE003798	FBgn0034390	5	141593_at		CG5798	CT18196	AE003733	FBgn0038862	5
6	147202_at		CG17386	CT33484	AE003814	FBgn0033936	6	150574_at		CG11891	CT37044	AE003751	FBgn0039309	6	142271_at	UDP-glycosyltransferase 35b	Ugt35b	CT20678	AE003690	FBgn0026314	6	141378_at		CG9699	CT27408	AE003503	FBgn0030772	6	153092_at		Chd64	CT34849	AE003480	FBgn0035499	6	152151_at		CG3902	CT12987	AE003519	FBgn0036824	6	142271_at	UDP-glycosyltransferase 35b	Ugt35b	CT20678	AE003690	FBgn0026314	6
7	148418_at		CG13305	CT32600	AE003554	FBgn0035921	7	150586_at		CG10553	CT29612	AE003751	FBgn0039324	7	143869_at	vrille	vri	CT33588	AE003609	FBgn0016076	7	141429_at		CG8300	CT24539	AE003439	FBgn0029937	7	153624_at		CG15162	CT35063	AE003659	FBgn0032694	7	152970_at		CG11140	CT41571	AE003841	FBgn0033180	7	143869_at	vrille	vri	CT33588	AE003609	FBgn0016076	7
8	149615_at		CG3940	CT13118	AE003685	FBgn0037788	8	152156_at	Calphotin	Cpn	CT15219	AE003694	FBgn0010218	8	144739_at		CG12120	CT7356	AE003446	FBgn0030106	8	141460_at		CG8034	CT24114	AE003511	FBgn0031011	8	154936_at		CG9285	CT26455	AE003701	FBgn0038184	8	152982_at		CG18330	CT1187	AE003472	FBgn0035231	8	144350_at		CG5254	CT16777	AE003418	FBgn0029533	8
9	152086_at		CG6409	CT20018	AE003547	FBgn0036106	9	144739_at		CG12120	CT7356	AE003446	FBgn0030106	9	150574_at		CG11891	CT37044	AE003751	FBgn0039309	9	141522_at		CG8643	CT8739	AE003836	FBgn0033311	9	141593_at		CG5798	CT18196	AE003733	FBgn0038862	9	153610_at		CG3488	CT11757	AE003580	FBgn0014906	9	145570_at		CG5156	CT16503	AE003587	FBgn0031326	9
10	152308_at		CG10433	CT29298	AE003454	FBgn0034638	10	143557_at	Histidine decarboxylase	Hdc	CT11641	AE003830	FBgn0005619	10	150586_at		CG10553	CT29612	AE003751	FBgn0039324	10	141547_at	Zwischenferment	Zw	CT33838	AE003512	FBgn0004057	10	142154_at	timeless	tim	CT39082	AE003579	FBgn0014396	10	142736_s_at		CG16796	CT37345	AE003807	FBgn0034115	10	146022_at		CG14275	CT33900	AE003620	FBgn0032022	10
11	152597_at		SP2523	CT14058	AE003558	FBgn0035808	11	152005_at		CG7077	CT21877	AE003738	FBgn0038946	11	151642_at		CG17100	CT34464		FBgn0037813	11	141580_at	Beta Adaptin	Bap	CT33851	AE003513	FBgn0010380	11	142271_at	UDP-glycosyltransferase 35b	Ugt35b	CT20678	AE003690	FBgn0026314	11	151961_at		CG5397	CT16527	AE003586	FBgn0031327	11	149303_at		CG14661	CT34439	AE003604	FBgn0037288	11
12	153092_at		Chd64	CT34849	AE003480	FBgn0035499	12	154814_at	Aldolase	Ald	CT41919	AE003755	FBgn0000064	12	151681_at		CG12790	CT37283		FBgn0035342	12	141593_at		CG5798	CT18196	AE003733	FBgn0038862	12	143300_at	period	per	CT8963	AE003425	FBgn0003068	12	146349_at		CG17988	CT40163	AE003641	FBgn0032536	12	150574_at		CG11891	CT37044	AE003751	FBgn0039309	12
13	153624_at		CG15162	CT35063	AE003659	FBgn0032694	13	152019_at	takeout	CG11853	CT33074	AE003751	FBgn0039298	13	152019_at	takeout	CG11853	CT33074	AE003751	FBgn0039298	13	141640_at	apterous	ap	CT4996	AE003785	FBgn0000099	13	143869_at	vrille	vri	CT33588	AE003609	FBgn0016076	13	142139_at		CG3699	CT12411	AE003419	FBgn0029549	13	150586_at		CG10553	CT29612	AE003751	FBgn0039324	13
14	154936_at		CG9285	CT26455	AE003701	FBgn0038184	14	152597_at		SP2523	CT14058	AE003558	FBgn0035808	14	152682_at	Slowpoke binding protein	Slob	CT20985	AE003618	FBgn0024290	14	141647_at		CG12016	CT1661	AE003477	FBgn0035436	14	145570_at		CG5156	CT16503	AE003587	FBgn0031326	14	147772_at		CG9891	CT27880	AE003460	FBgn0034856	14	151568_at		CG11326	CT31613		FBgn0031850	14
15	141593_at		CG5798	CT18196	AE003733	FBgn0038862	15	142271_at	UDP-glycosyltransferase 35b	Ugt35b	CT20678	AE003690	FBgn0026314	15	154963_at		CG10237	CT28775	AE003662	FBgn0032783	15	142141_at		CG4723	CT15197	AE003740	FBgn0039023	15	146022_at		CG14275	CT33900	AE003620	FBgn0032022	15	152721_at	Imaginal Disc Growth Factor 1	Idgf1	CT14554	AE003651	FBgn0020416	15	152019_at	takeout	CG11853	CT33074	AE003751	FBgn0039298	15
16	141732_at	puckered	puc	CT23760	AE003677	FBgn0004210	16	146269_at		CG14946	CT34777	AE003634	FBgn0032405	16	143970_at	Clock	Clk	CT13692	AE003557	FBgn0023076	16	142154_at	timeless	tim	CT39082	AE003579	FBgn0014396	16	150574_at		CG11891	CT37044	AE003751	FBgn0039309	16	143808_at	myoblast city	mbc	CT29150	AE003744	FBgn0015513	16	152192_at	Calnexin 99A	Cnx99A	CT4036	AE003769	FBgn0015622	16
17	142154_at	timeless	tim	CT39082	AE003579	FBgn0014396	17	152204_at		CG6070	CT19045	AE003759	FBgn0039487	17	152958_at		Cyp4d21	CT20878	AE003618	FBgn0031925	17	142190_at		Cyp6a21	CT28795	AE003813	FBgn0033981	17	150586_at		CG10553	CT29612	AE003751	FBgn0039324	17	142190_at		Cyp6a21	CT28795	AE003813	FBgn0033981	17	152682_at	Slowpoke binding protein	Slob	CT20985	AE003618	FBgn0024290	17
18	142271_at	UDP-glycosyltransferase 35b	Ugt35b	CT20678	AE003690	FBgn0026314	18	152342_at		CG7854	CT23808	AE003771	FBgn0039717	18	153433_at	Photoreceptor dehydrogenase	Pdh	CT15746	AE003527	FBgn0011693	18	142271_at	UDP-glycosyltransferase 35b	Ugt35b	CT20678	AE003690	FBgn0026314	18	151485_s_at	timeless	tim	CT3982		FBgn0014396	18	142271_at	UDP-glycosyltransferase 35b	Ugt35b	CT20678	AE003690	FBgn0026314	18	143130_at	cAMP-dependent protein kinase	Pka-C3	CT19108	AE003529	FBgn0000489	18
19	143300_at	period	per	CT8963	AE003425	FBgn0003068	19	141361_at		CG11880	CT34242	AE003768	FBgn0039637	19	154176_at		CG2827	CT9666	AE003462	FBgn0034934	19	142367_at		CG9649	CT27276	AE003703	FBgn0038211	19	152019_at	takeout	CG11853	CT33074	AE003751	FBgn0039298	19	142480_at		CG17534	CT38753	AE003799	FBgn0034343	19	143390_at	betaTubulin56D	betaTub56D	CT37566	AE003795	FBgn0003887	19
20	143869_at	vrille	vri	CT33588	AE003609	FBgn0016076	20	146788_at		CG11210	CT31310	AE003838	FBgn0033259	20	148870_at		CG4962	CT15908	AE003528	FBgn0036597	20	142590_at		CG9066	CT26026	AE003500	FBgn0030703	20	152113_at	anachronism	ana	CT4622	AE003834	FBgn0011746	20	142537_at		CG17530	CT38747	AE003799	FBgn0034340	20	143554_at	trp-like	trpl	CT4790	AE003832	FBgn0005614	20
21	144350_at		CG5254	CT16777	AE003418	FBgn0029533	21	144827_at		CG15211	CT35143	AE003484	FBgn0030234	21	151871_at		BcDNA:GH02712	CT6764	AE003840	FBgn0027604	21	142850_at		CG7288	CT22437	AE003510	FBgn0030969	21	152682_at	Slowpoke binding protein	Slob	CT20985	AE003618	FBgn0024290	21	1623068_at						21	143559_at	pale	ple	CT28477	AE003561	FBgn0005626	21
22	144739_at		CG12120	CT7356	AE003446	FBgn0030106	22	152931_at		CG10131	CT28517	AE003814	FBgn0033949	22	151899_at		CG11796	CT36593	AE003591	FBgn0036992	22	142881_at	pelle	pll	CT18773	AE003760	FBgn0010441	22	153296_at		myo-inositol-1-phosphate-synthase	CT31151	AE003841	FBgn0025885	22	152120_at		Cyp6d5	CT10252	AE003702	FBgn0038194	22	148870_at		CG4962	CT15908	AE003528	FBgn0036597	22
23	145570_at		CG5156	CT16503	AE003587	FBgn0031326	23	154687_at		CG3749	CT12421	AE003465	FBgn0035074	23	152156_at	Calphotin	Cpn	CT15219	AE003694	FBgn0010218	23	142919_s_at		CG2049	CT6637	AE003834	FBgn0033398	23	141522_at		CG8643	CT8739	AE003836	FBgn0033311	23	152313_at		Cyp6a17	CT28783	AE003813	FBgn0015714	23	149871_at		CG3153	CT10556	AE003703	FBgn0038198	23
24	146022_at		CG14275	CT33900	AE003620	FBgn0032022	24	154176_at		CG2827	CT9666	AE003462	FBgn0034934	24	152256_at		CG2121	CT6910	AE003837	FBgn0033289	24	143093_at	Catalase	Cat	CT21282	AE003519	FBgn0000261	24	143970_at	Clock	Clk	CT13692	AE003557	FBgn0023076	24	152598_at		CG5164	CT16545	AE003799	FBgn0034335	24	151433_at		CG16978	CT35582	AE003639	FBgn0040972	24
25	146468_at		CG15171	CT35080	AE003661	FBgn0032739	25	142866_at		CG12269	CT17012	AE003724	FBgn0038665	25	152382_at		CG7149	CT22085	AE003618	FBgn0031948	25	143120_at	Developmental embryonic B	DebB	CT25454	AE003823	FBgn0000426	25	152958_at		Cyp4d21	CT20878	AE003618	FBgn0031925	25	143127_at	Cytochrome P45-6a2	Cyp6a2	CT11585	AE003789	FBgn0000473	25	151795_at		CG7176	CT22171	AE003555	FBgn0035881	25
26	149303_at		CG14661	CT34439	AE003604	FBgn0037288	26	151876_at		Reg-2	CT10568	AE003468	FBgn0016715	26	152629_at		CG5455	CT17296	AE003756	FBgn0039430	26	143137_at	easter	ea	CT15808	AE003708	FBgn0000533	26	153433_at	Photoreceptor dehydrogenase	Pdh	CT15746	AE003527	FBgn0011693	26	143606_at	Cytochrome P45-18a1	Cyp18a1	CT20826	AE003509	FBgn0010383	26	151871_at		BcDNA:GH02712	CT6764	AE003840	FBgn0027604	26
27	150574_at		CG11891	CT37044	AE003751	FBgn0039309	27	151899_at		CG11796	CT36593	AE003591	FBgn0036992	27	152819_at		CG11407	CT31802	AE003727	FBgn0038733	27	143300_at	period	per	CT8963	AE003425	FBgn0003068	27	143554_at	trp-like	trpl	CT4790	AE003832	FBgn0005614	27	141461_at	Aminolevulinate synthase	Alas	CT10152	AE003462	FBgn0020764	27	151927_at		CG4784	CT15377	AE003527	FBgn0036619	27
28	150586_at		CG10553	CT29612	AE003751	FBgn0039324	28	144360_at		CG16994	CT34390	AE003419	FBgn0029544	0.430556							28	143338_f_at	Serine protease 1	Ser99Da	CT6684	AE003771	FBgn0003356	28	149871_at		CG3153	CT10556	AE003703	FBgn0038198	28	153604_at		CG14716	CT34507	AE003692	FBgn0037933	28	152156_at	Calphotin	Cpn	CT15219	AE003694	FBgn0010218	28
29	151316_at		CG15213	CT35146	AE003567	FBgn0040843	29	142103_at		CG14054			FBgn0025628	in common with							29	143430_at	Serotonin receptor 1A	5-HT1A	CT34985	AE003797	FBgn0004168	29	151871_at		BcDNA:GH02712	CT6764	AE003840	FBgn0027604	29	151871_at		BcDNA:GH02712	CT6764	AE003840	FBgn0027604	29	152513_at		CG10513	CT29500	AE003751	FBgn0039311	29
30	151485_s_at	timeless	tim	CT3982		FBgn0014396	30	148550_at		CG6272	CT19628	AE003546	FBgn0036126	the LD meta set							30	143554_at	trp-like	trpl	CT4790	AE003832	FBgn0005614	30	151885_at		BcDNA:GH02901	CT25792	AE003497	FBgn0027601	30	152233_at	globin 1	glob1	CT27496	AE003711	FBgn0027657	30	152629_at		CG5455	CT17296	AE003756	FBgn0039430	30
31	151568_at		CG11326	CT31613		FBgn0031850	31	152325_at		CG10374	CT29130	AE003744	FBgn0039114								31	143606_at	Cytochrome P45-18a1	Cyp18a1	CT20826	AE003509	FBgn0010383	31	151897_at		CG4919	CT15810	AE003740	FBgn0039001	31	152310_at		CG13848	CT33362	AE003739	FBgn0038966	31	152982_at		CG18330	CT1187	AE003472	FBgn0035231	31
32	151642_at		CG17100	CT34464		FBgn0037813	32	149755_at		CG10091	CT28271	AE003695	FBgn0038020								32	143622_at	Troponin C at 47D	TpnC47D	CT26048	AE003826	FBgn0010423	32	151927_at		CG4784	CT15377	AE003527	FBgn0036619	32	152890_at		CG10126	CT28495	AE003697	FBgn0038088	0.267241							32
33	151681_at		CG12790	CT37283		FBgn0035342	33	142139_at		CG3699	CT12411	AE003419	FBgn0029549								33	143678_at	Ejaculatory bulb protein III	PebIII	CT31804	AE003462	FBgn0011695	33	152256_at		CG2121	CT6910	AE003837	FBgn0033289	33	143559_at	pale	ple	CT28477	AE003561	FBgn0005626	in common with							33
34	152019_at	takeout	CG11853	CT33074	AE003751	FBgn0039298	34	149615_at		CG3940	CT13118	AE003685	FBgn0037788								34	143681_at	Septin-1	36770	CT3234	AE003568	FBgn0011710	34	152513_at		CG10513	CT29500	AE003751	FBgn0039311	34	152272_at	Excitatory amino acid transporter 2	Eaat2	CT10234	AE003588	FBgn0026438	the LD meta set							34
35	152113_at	anachronism	ana	CT4622	AE003834	FBgn0011746	35	154892_at		CG11208	CT31300	AE003793	FBgn0034488								35	143690_at	Ferredoxin	Fdxh	CT13846	AE003552	FBgn0011769	35	152767_at		CG13631	CT33025	AE003749	FBgn0040600	35	152456_at	Dopamine N acetyltransferase	Dat	CT11137	AE003463	FBgn0019643								35
36	152192_at	Calnexin 99A	Cnx99A	CT4036	AE003769	FBgn0015622	36	150008_at		CG10311	CT28967	AE003713	FBgn0038420								36	143731_at	Guanyl cyclase beta-subunit at 1B	Gycbeta100B	CT3618	AE003777	FBgn0013973	36	152819_at		CG11407	CT31802	AE003727	FBgn0038733	36	145977_at		CG13796	CT42497	AE003618	FBgn0031939								36
37	152457_at		CG3672	CT12317	AE003552	FBgn0035985	37	152682_at	Slowpoke binding protein	Slob	CT20985	AE003618	FBgn0024290								37	143738_at	NEM-sensitive fusion protein 2	Nsf2	CT27876	AE003702	FBgn0013998	37	153085_at	Rhodopsin 5	Rh5	CT16797	AE003634	FBgn0014019	37	141440_at	black	b	CT23730	AE003641	FBgn0000153								37
38	152673_at	cryptochrome	cry	CT12574	AE003725	FBgn0025680	38	152256_at		CG2121	CT6910	AE003837	FBgn0033289								38	143777_at	Adenosylhomocysteinase 89E	Ahcy89E	CT25706	AE003715	FBgn0015011	38	153424_at	Serotonin receptor 2	5-HT2	CT1149	AE003605	FBgn0013743	38	152931_at		CG10131	CT28517	AE003814	FBgn0033949								38
39	152682_at	Slowpoke binding protein	Slob	CT20985	AE003618	FBgn0024290	39	155095_at		CG7074	CT21859	AE003584	FBgn0031399								39	143869_at	vrille	vri	CT33588	AE003609	FBgn0016076	0.238994							39	153042_at		CG6680	CT20740	AE003514	FBgn0036968								39
40	153296_at		myo-inositol-1-phosphate-synthase	CT31151	AE003841	FBgn0025885	40	141593_at		CG5798	CT18196	AE003733	FBgn0038862								40	143912_at	ATP citrate lyase	ATPCL	CT18257	AE003808	FBgn0020236	in common with							40	145728_at		CG16704	CT37177	AE003579	FBgn0031558								40
41	154302_at		CG2277	CT7561	AE003471	FBgn0035204	41	153313_at	glass multimer reporter construct of Nolan	Rac2	CT14366	AE003559	FBgn0014011								41	143970_at	Clock	Clk	CT13692	AE003557	FBgn0023076	the LD meta set							41	145730_at		CG16713	CT37195	AE003579	FBgn0031560								41
42	154963_at		CG10237	CT28775	AE003662	FBgn0032783	42	148870_at		CG4962	CT15908	AE003528	FBgn0036597								42	144678_at		CG15335	CT35336	AE003443	FBgn0030001								42	141593_at		CG5798	CT18196	AE003733	FBgn0038862								42
43	141522_at		CG8643	CT8739	AE003836	FBgn0033311	43	152889_at	delilah	dei	CT17256	AE003756	FBgn0008649								43	144701_at		CG12116	CT7002	AE003444	FBgn0030041								43	142705_at	Proteasome 26kD subunit	Pros26	CT13566	AE003526	FBgn0002284								43
44	143130_at	cAMP-dependent protein kinase	Pka-C3	CT19108	AE003529	FBgn0000489	44	141248_at		CG5031	CT16138	AE003533	FBgn0036435								44	144983_at		CG2190	CT7066	AE003491	FBgn0030446								44	142982_at	Proteasome 26S subunit subunit 4 ATPase	Pros26.4	CT16771	AE003745	FBgn0015282								44
45	143970_at	Clock	Clk	CT13692	AE003557	FBgn0023076	45	152629_at		CG5455	CT17296	AE003756	FBgn0039430								45	145342_r_at		CG14191	CT33802	AE003511	FBgn0030981								45	154003_at		CG2922	CT7240	AE003602	FBgn0037346								45
46	148005_at		CG12023	CT1769	AE003472	FBgn0035278	46	147377_at		CG14480	CT34191	AE003802	FBgn0034242								46	145455_at		CG15447	CT35511	AE003569	FBgn0031151								46	154661_at		CG17937	CT39962	AE003652	FBgn0032610								46
47	150573_at		CG11889	CT33082	AE003751	FBgn0039308	47	143869_at	vrille	vri	CT33588	AE003609	FBgn0016076								47	145473_at		CG1696	CT4802	AE003568	FBgn0031173								47	148360_at		CG7409	CT16169	AE003558	FBgn0035817								47
48	151933_at		BcDNA:GH03693	CT12621	AE003525	FBgn0027593	48	151642_at		CG17100	CT34464		FBgn0037813								48	145570_at		CG5156	CT16503	AE003587	FBgn0031326								48	152192_at	Calnexin 99A	Cnx99A	CT4036	AE003769	FBgn0015622								48
49	152958_at		Cyp4d21	CT20878	AE003618	FBgn0031925	49	153038_at		CG3135	CT10514	AE003438	FBgn0029901								49	145774_at		CG15632	CT35787	AE003575	FBgn0031623								49	148676_at		CG10948	CT30663	AE003540	FBgn0036317								49
50	153055_at	PAR-domain protein 1	Pdp1	CT39809	AE003557	FBgn0016694	50	145732_at		CG3604	CT11958	AE003579	FBgn0031562								50	145954_at		CG5181	CT16587	AE003617	FBgn0031909								50	153313_at	glass multimer reporter construct of Nolan	Rac2	CT14366	AE003559	FBgn0014011								50
51	153433_at	Photoreceptor dehydrogenase	Pdh	CT15746	AE003527	FBgn0011693	51	151576_s_at	pangolin	pan	CT432		FBgn0019664								51	146022_at		CG14275	CT33900	AE003620	FBgn0032022								51	143670_at	Mothers against dpp	Mad	CT27272	AE003580	FBgn0011648								51
52	154176_at		CG2827	CT9666	AE003462	FBgn0034934	52	152133_at	cappuccino	capu	CT11427	AE003578	FBgn0000256								52	146184_at		CG17108	CT33647	AE003629	FBgn0032285								52	143869_at	vrille	vri	CT33588	AE003609	FBgn0016076								52
53	141762_at	Cysteine proteinase-1	Cp1	CT20780	AE003816	FBgn0013770	53	154452_at		CG12132	CT7740	AE003446	FBgn0030123								53	146190_at		CG17124	CT33646	AE003629	FBgn0032297								53	144711_at		CG11294	CT31519	AE003444	FBgn0030058								53
54	141795_at		CG13644	CT33039	AE003749	FBgn0039247	54	152215_at		BcDNA:GH09045	CT37494	AE003701	FBgn0028487								54	146323_at		CG5945	CT18564	AE003639	FBgn0032494								54	148550_at		CG6272	CT19628	AE003546	FBgn0036126								54
55	143390_at	betaTubulin56D	betaTub56D	CT37566	AE003795	FBgn0003887	55	152240_at		CG9855	CT27818	AE003606	FBgn0037242								55	146379_at		CG17932	CT39950	AE003652	FBgn0032606								55	152629_at		CG5455	CT17296	AE003756	FBgn0039430								55
56	143554_at	trp-like	trpl	CT4790	AE003832	FBgn0005614	56	151740_at		CG7033	CT21728		FBgn0030086								56	146697_at		CG15236	CT35175	AE003790	FBgn0033108								56	154233_at	Transcription factor IIA L	TfIIA-L	CT18631	AE003760	FBgn0011289								56
57	143559_at	pale	ple	CT28477	AE003561	FBgn0005626	57	147202_at		CG17386	CT33484	AE003814	FBgn0033936								57	147202_at		CG17386	CT33484	AE003814	FBgn0033936								57	154388_at	upstream of RpII14	140up	CT27808	AE003703	FBgn0010340								57
58	144146_at	Excitatory amino acid transporter 1	Eaat1	CT12517	AE003624	FBgn0026439	58	152521_at		CG1441	CT3453	AE003831	FBgn0033464								58	147227_at		CG10253	CT28813	AE003812	FBgn0033983								58	141326_at	A kinase anchor protein 2	Akap200	CT32734	AE003621	FBgn0027932								58
59	146167_at		CG18302	CT41543	AE003629	FBgn0032266	59	152958_at		Cyp4d21	CT20878	AE003618	FBgn0031925								59	147436_at		CG17524	CT38741	AE003799	FBgn0034337								59	142677_s_at	Protein kinase 61C	Pk61C	CT42511	AE003467	FBgn0020386								59
60	146233_at		CG4779	CT15337	AE003631	FBgn0032349	60	153468_at	Nervana 1	Nrv1	CT26400	AE003615	FBgn0015776								60	147517_at		CG8462	CT24685	AE003794	FBgn0034471								60	143130_at	cAMP-dependent protein kinase	Pka-C3	CT19108	AE003529	FBgn0000489								60
61	146274_at		CG17211	CT34781	AE003635	FBgn0032414	61	147337_at		CG6429	CT19898	AE003805	FBgn0034164								61	147556_at		CG13435	CT32792	AE003791	FBgn0034525								61	147326_at		CG15617	CT35755	AE003805	FBgn0034151								61
62	148870_at		CG4962	CT15908	AE003528	FBgn0036597	62	152310_at		CG13848	CT33362	AE003739	FBgn0038966								62	147699_at		CG4250	CT13934	AE003458	FBgn0034761								62	147490_at		CG9811	CT27512	AE003796	FBgn0034434								62
63	149871_at		CG3153	CT10556	AE003703	FBgn0038198	63	151772_at	discs large 1	dlg1	CT41310	AE003486	FBgn0001624								63	147840_at		CG4049	CT13348	AE003463	FBgn0034976								63	152682_at	Slowpoke binding protein	Slob	CT20985	AE003618	FBgn0024290								63
64	150697_at		CG6309	CT19744	AE003758	FBgn0039468	64	146708_at		CG12846	CT31978	AE003842	FBgn0033125								64	147991_at		CG13928	CT33467	AE003472	FBgn0035246								64	153092_at		Chd64	CT34849	AE003480	FBgn0035499								64
65	151433_at		CG16978	CT35582	AE003639	FBgn0040972	65	152382_at		CG7149	CT22085	AE003618	FBgn0031948								65	148040_at		CG8993	CT25846	AE003474	FBgn0035334								65	142836_at	Heat shock protein 22	Hsp22	CT14508	AE003552	FBgn0001223								65
66	151795_at		CG7176	CT22171	AE003555	FBgn0035881	66	152819_at		CG11407	CT31802	AE003727	FBgn0038733								66	148092_at		CG11531	CT36417	AE003477	FBgn0035418								66	152019_at	takeout	CG11853	CT33074	AE003751	FBgn0039298								66
67	151871_at		BcDNA:GH02712	CT6764	AE003840	FBgn0027604	67	143970_at	Clock	Clk	CT13692	AE003557	FBgn0023076								67	148418_at		CG13305	CT32600	AE003554	FBgn0035921								67	148758_at		CG17703	CT39222	AE003534	FBgn0036434								67
68	151885_at		BcDNA:GH02901	CT25792	AE003497	FBgn0027601	68	141440_at	black	b	CT23730	AE003641	FBgn0000153								68	148449_at		CG4684	CT15077	AE003553	FBgn0035966								68	141589_at		CG6725	CT20881	AE003712	FBgn0038413								68
69	151897_at		CG4919	CT15810	AE003740	FBgn0039001	69	152003_at		CG9629	CT27218	AE003517	FBgn0036857								69	148551_at		CG7828	CT23750	AE003546	FBgn0036127								69	143390_at	betaTubulin56D	betaTub56D	CT37566	AE003795	FBgn0003887								69
70	151899_at		CG11796	CT36593	AE003591	FBgn0036992	70	154963_at		CG10237	CT28775	AE003662	FBgn0032783								70	149450_at		CG18291	CT41499	AE003671	FBgn0037507								70	146788_at		CG11210	CT31310	AE003838	FBgn0033259								70
71	151927_at		CG4784	CT15377	AE003527	FBgn0036619	71	141394_at		CG10479	CT29418	AE003564	FBgn0035656								71	149514_at		CG9748	CT27543	AE003679	FBgn0037604								71	151568_at		CG11326	CT31613		FBgn0031850								71
72	152156_at	Calphotin	Cpn	CT15219	AE003694	FBgn0010218	72	151658_at	amphiphysin	amphiphysin	CT259		FBgn0027356								72	149738_r_at		CG14742	CT34536	AE003695	FBgn0037997								72	151927_at		CG4784	CT15377	AE003527	FBgn0036619								72
73	152256_at		CG2121	CT6910	AE003837	FBgn0033289															73	149794_at		CG6188	CT19392	AE003696	FBgn0038074								73	152156_at	Calphotin	Cpn	CT15219	AE003694	FBgn0010218								73
74	152382_at		CG7149	CT22085	AE003618	FBgn0031948															74	149871_at		CG3153	CT10556	AE003703	FBgn0038198								74	152133_at	cappuccino	capu	CT11427	AE003578	FBgn0000256								74
75	152513_at		CG10513	CT29500	AE003751	FBgn0039311															75	149882_at		CG9645	CT27240	AE003703	FBgn0038212								75	153069_at		CG15096	CT42567	AE003798	FBgn0034394								75
76	152629_at		CG5455	CT17296	AE003756	FBgn0039430															76	150232_at		CG4451	CT14474	AE003728	FBgn0038755								76	153366_at		CG10960	CT30701	AE003540	FBgn0036316								76
77	152767_at		CG13631	CT33025	AE003749	FBgn0040600															77	150574_at		CG11891	CT37044	AE003751	FBgn0039309								77	143554_at	trp-like	trpl	CT4790	AE003832	FBgn0005614								77
78	152819_at		CG11407	CT31802	AE003727	FBgn0038733															78	150586_at		CG10553	CT29612	AE003751	FBgn0039324								78	144350_at		CG5254	CT16777	AE003418	FBgn0029533								78
79	152982_at		CG18330	CT1187	AE003472	FBgn0035231															79	150656_at		CG6162	CT19356	AE003756	FBgn0039422								79	141456_at		CG3770	CT12588	AE003465	FBgn0035085								79
80	153085_at	Rhodopsin 5	Rh5	CT16797	AE003634	FBgn0014019															80	150754_at		CG5566	CT17602	AE003762	FBgn0039550								80	142724_at		CG11137	CT31141	AE003599	FBgn0037199								80
81	153424_at	Serotonin receptor 2	5-HT2	CT1149	AE003605	FBgn0013743															81	150759_at		CG4963	CT15898	AE003763	FBgn0039561								81	143026_at		CG10208	CT28701	AE003744	FBgn0039118								81
82	149420_at		CG1943	CT6062	AE003673	FBgn0037468															82	150831_at		CG18111	CT40745	AE003770	FBgn0039678								82	144118_at		EG:63B12.12	CT34631	AE003422	FBgn0026088								82
83	153972_at		CG18218	CT41222	AE003526	FBgn0036645															83	150878_at		CG1359	CT2829	AE003772	FBgn0039753								83	144770_at		CG9686	CT6802	AE003448	FBgn0030158								83
84	141646_at		CG17544	CT38761	AE003662	FBgn0032775															84	151266_at		CG13064	CT32283	AE003528	FBgn0040796								84	145236_at		CG12998	CT32204	AE003504	FBgn0030829								84
85	143184_at	Glutathione S transferase D1	GstD1	CT28269	AE003695	FBgn0001149															85	151352_at		CG6278	CT19638	AE003508	FBgn0040879								85	145237_at		CG5172	CT16557	AE003504	FBgn0030830								85
86	144149_at		Ady43A	CT5683	AE003842	FBgn0026602															86	151485_s_at	timeless	tim	CT3982		FBgn0014396								86	145570_at		CG5156	CT16503	AE003587	FBgn0031326								86
87	144338_at		CG13377	CT32709	AE003417	FBgn0029517															87	151658_at	amphiphysin	amphiphysin	CT259		FBgn0027356								87	146022_at		CG14275	CT33900	AE003620	FBgn0032022								87
88	144572_at		CG4666	CT15013	AE003436	FBgn0029838															88	151760_at		CG8468	CT24721		FBgn0033913								88	146181_at		CG7299	CT22515	AE003629	FBgn0032282								88
89	145206_at		CG18358	CT41728	AE003503	FBgn0030782															89	151797_at		CG10611	CT29736	AE003664	FBgn0032820								89	146184_at		CG17108	CT33647	AE003629	FBgn0032285								89
90	147462_at		CG15075	CT34950	AE003798	FBgn0034385															90	151800_at		CG4847	CT15577	AE003803	FBgn0034229								90	146323_at		CG5945	CT18564	AE003639	FBgn0032494								90
91	148529_at		CG14153	CT33756	AE003547	FBgn0036094															91	151854_at		BcDNA:GH02435	CT35501	AE003576	FBgn0027609								91	147042_at		CG8986	CT25838	AE003824	FBgn0033658								91
92	149700_at		CG6834	CT21175	AE003692	FBgn0037935															92	151871_at		BcDNA:GH02712	CT6764	AE003840	FBgn0027604								92	147139_at		CG10799	CT30256	AE003819	FBgn0033821								92
93	150762_at		CG4869	CT15625	AE003763	FBgn0039567															93	151885_at		BcDNA:GH02901	CT25792	AE003497	FBgn0027601								93	147202_at		CG17386	CT33484	AE003814	FBgn0033936								93
94	151222_at		CG12955	CT32147	AE003811	FBgn0040746															94	151897_at		CG4919	CT15810	AE003740	FBgn0039001								94	147210_at		CG12868	CT32008	AE003814	FBgn0033945								94
95	152139_at		CG17352	CT33100	AE003555	FBgn0035880															95	151902_at		CG11605	CT36572	AE003458	FBgn0034772								95	147224_at		CG10205	CT28709	AE003813	FBgn0033970								95
96	152261_at	Carbonic anhydrase 1	CAH1	CT23642	AE003641	FBgn0027844															96	151927_at		CG4784	CT15377	AE003527	FBgn0036619								96	147871_at		CG11413	CT31865	AE003464	FBgn0035022								96
97	153408_at		CG14557	CT34288	AE003755	FBgn0039414															97	151937_at		CG1213	CT30783	AE003601	FBgn0037387								97	148418_at		CG13305	CT32600	AE003554	FBgn0035921								97
98	154188_at		CG4991	CT15971	AE003504	FBgn0030817															98	152019_at	takeout	CG11853	CT33074	AE003751	FBgn0039298								98	148870_at		CG4962	CT15908	AE003528	FBgn0036597								98
99	141512_at		CG10355	CT29092	AE003663	FBgn0032802															99	152020_at		CG9622	CT27178	AE003710	FBgn0038372								99	148873_at		CG13043	CT32262	AE003527	FBgn0036600								99
100	141541_at		CG13868	CT33390	AE003792	FBgn0034501															100	152083_at		CG15093	CT34968	AE003798	FBgn0034390								100	149244_at		CG14454	CT34135	AE003598	FBgn0037177								100
101	142542_at		CG2841	CT9712	AE003423	FBgn0029614															101	152113_at	anachronism	ana	CT4622	AE003834	FBgn0011746								101	149303_at		CG14661	CT34439	AE003604	FBgn0037288								101
102	142989_at		CG8008	CT8032	AE003834	FBgn0033387															102	152123_at		CG6218	CT19478	AE003708	FBgn0038321								102	149871_at		CG3153	CT10556	AE003703	FBgn0038198								102
103	143203_at	inactivation no afterpotential D	inaD	CT11813	AE003458	FBgn0001263															103	152166_at		CG9377	CT26601	AE003639	FBgn0032507								103	150122_at		CG18598	CT42539	AE003721	FBgn0038589								103
104	143475_at	dusky	dy	CT26577	AE003487	FBgn0004511															104	152188_at	locomotion defects	loco	CT15814	AE003739	FBgn0020278								104	150309_at		CG17298	CT35916	AE003734	FBgn0038879								104
105	143537_at	goliath	gol	CT9061	AE003466	FBgn0004919															105	152203_at	neither inactivation nor afterpotential A	ninaA	CT13015	AE003588	FBgn0002936								105	150565_at		CG11852	CT33073	AE003751	FBgn0039297								105
106	145326_s_at		CG18259	CT41379	AE003510	FBgn0030956															106	152227_at		CG6126	CT19169	AE003712	FBgn0038407								106	150574_at		CG11891	CT37044	AE003751	FBgn0039309								106
107	146129_at		CG5731	CT18017	AE003627	FBgn0032192															107	152256_at		CG2121	CT6910	AE003837	FBgn0033289								107	150576_at		CG10514	CT29508	AE003751	FBgn0039312								107
108	147112_at		CG8771	CT25298	AE003821	FBgn0033766															108	152308_at		CG10433	CT29298	AE003454	FBgn0034638								108	150586_at		CG10553	CT29612	AE003751	FBgn0039324								108
109	147181_at		CG18371	CT41759	AE003816	FBgn0033893															109	152310_at		CG13848	CT33362	AE003739	FBgn0038966								109	151433_at		CG16978	CT35582	AE003639	FBgn0040972								109
110	147913_at		CG17142	CT33412	AE003467	FBgn0035113															110	152416_at		CG11045	CT28033	AE003614	FBgn0031833								110	144077_at		EG:115C2.8	CT32696	AE003418	FBgn0025634								110
111	149398_at		CG10296	CT28911	AE003675	FBgn0037436															111	152425_at		CG3174	CT10647	AE003789	FBgn0033079								111	152263_at		CG9312	CT26517	AE003701	FBgn0038179								111
112	150125_at		CG18599	CT42541	AE003721	FBgn0038592															112	152478_at		CG2765	CT9411	AE003465	FBgn0035087								112	152513_at		CG10513	CT29500	AE003751	FBgn0039311								112
113	150858_at		CG15518	CT35631	AE003771	FBgn0039721															113	152513_at		CG10513	CT29500	AE003751	FBgn0039311								113	153241_at		CG5100	CT16351	AE003591	FBgn0037006								113
114	152418_at	bangles and beads	bnb	CT21889	AE003510	FBgn0001090															114	152521_at		CG1441	CT3453	AE003831	FBgn0033464								114	153351_at		CG8331	CT24597	AE003815	FBgn0033906								114
115	152781_at	Phosphogluconate dehydrogenase	Pgd	CT12475	AE003423	FBgn0004654															115	152552_at		CG6166	CT19364	AE003756	FBgn0039423								115	153900_at		CG9526	CT26954	AE003613	FBgn0031815								115
116	153179_at		CG11866	CT37014	AE003830	FBgn0033486															116	152633_at	prune	pn	CT11665	AE003423	FBgn0003116								116	153957_at		CG9044	CT25972	AE003611	FBgn0031752								116
117	153418_at		CG7908	CT23908	AE003772	FBgn0039734															117	152682_at	Slowpoke binding protein	Slob	CT20985	AE003618	FBgn0024290																						117
118	153429_at		CG1561	CT4048	AE003486	FBgn0030317															118	152700_at		CG3364	CT11313	AE003790	FBgn0033123																						118
119	153797_at		CG7869	CT23828	AE003546	FBgn0036120															119	152713_at		CG9363	CT26609	AE003682	FBgn0037697																						119
120	141203_at		CG2947	CT9995	AE003429	FBgn0029676															120	152722_at		CG8136	CT24268	AE003680	FBgn0037616																						120
121	141410_at		CG9307	CT26495	AE003701	FBgn0038180															121	152767_at		CG13631	CT33025	AE003749	FBgn0040600																						121
122	141447_at		CG4914	CT15764	AE003533	FBgn0036436															122	152819_at		CG11407	CT31802	AE003727	FBgn0038733																						122
123	141543_at	lethal (2) neighbor of tid	l(2)not	CT13514	AE003461	FBgn0011297															123	152858_at	roughex	rux	CT14181	AE003436	FBgn0003302																						123
124	141653_at		EG:22E5.3	CT13484	AE003423	FBgn0025630															124	152932_at	ebony	e	CT11183	AE003734	FBgn0000527																						124
125	141884_at		CG1394			FBgn0026268															125	152958_at		Cyp4d21	CT20878	AE003618	FBgn0031925																						125
126	142104_at					FBgn0001961															126	153048_at		CG12855	CT31995	AE003813	FBgn0033973																						126
127	142293_at		CG12286	CT19021	AE003696	FBgn0038077															127	153050_at		Cyp305a1	CT25219	AE003515	FBgn0036910																						127
128	142735_at		CG7047	CT42521	AE003467	FBgn0035103															128	153085_at	Rhodopsin 5	Rh5	CT16797	AE003634	FBgn0014019																						128
129	143220_at	worniu	wor	CT13175	AE003647	FBgn0001983															129	153092_at		Chd64	CT34849	AE003480	FBgn0035499																						129
130	143236_at	lodestar	lds	CT9083	AE003676	FBgn0002542															130	153173_at		CG3495	CT11779	AE003459	FBgn0034794																						130
131	143238_at	Larval serum protein 1 alpha	Lsp1alpha	CT8649	AE003489	FBgn0002562															131	153203_at		CG6178	CT19388	AE003746	FBgn0039156																						131
132	143337_at	scalloped	sd	CT24895	AE003500	FBgn0003345															132	153248_at		CG5147	CT16489	AE003521	FBgn0036775																						132
133	143355_at	singed	sn	CT3977	AE003442	FBgn0003447															133	153296_at		myo-inositol-1-phosphate-synthase	CT31151	AE003841	FBgn0025885																						133
134	143356_at	snail	sna	CT13146	AE003647	FBgn0003448															134	153424_at	Serotonin receptor 2	5-HT2	CT1149	AE003605	FBgn0013743																						134
135	143445_at	Wnt oncogene analog 2	Wnt2	CT5942	AE003833	FBgn0004360															135	153433_at	Photoreceptor dehydrogenase	Pdh	CT15746	AE003527	FBgn0011693
136	143528_at	pollux	plx	CT1567	AE003602	FBgn0004879															136	153524_at	Rab-related protein 1	Rab-RP1	CT2771	AE003834	FBgn0015788
137	143546_at	Shaker cognate l	Shal	CT26372	AE003516	FBgn0005564															137	153570_at	moira	mor	CT14005	AE003711	FBgn0002783
138	143558_at	Posterior sex combs	Psc	CT12953	AE003820	FBgn0005624															138	153593_at	vasa intronic gene	vig	CT12457	AE003646	FBgn0024183
139	143651_at	TBP-associated factor 3kD subunit beta	Taf30beta	CT13550	AE003626	FBgn0011291															139	153594_at		CG5284	CT16841	AE003528	FBgn0036566
140	143905_at	Rhodopsin 6	Rh6	CT16621	AE003709	FBgn0019940															140	153624_at		CG15162	CT35063	AE003659	FBgn0032694
141	144067_at		CG4101	CT13608	AE003526	FBgn0025558															141	153720_at		CG17257	CT35455	AE003581	FBgn0031495
142	144278_at		BG:DS06874.2	CT15163	AE003645	FBgn0028869															142	153731_at	Heat shock protein 26	Hsp26	CT13810	AE003552	FBgn0001225
143	144395_at		CG14053	CT33614	AE003423	FBgn0029603															143	153735_at		CG9764	CT27585	AE003700	FBgn0038155
144	144474_at		CG12692	CT35696	AE003430	FBgn0029703															144	153828_at		CG15828	CT39214	AE003625	FBgn0032136
145	144633_at		CG14431	CT34093	AE003439	FBgn0029922															145	153864_at		CG9990	CT28159	AE003766	FBgn0039594
146	144636_at		CG3032	CT9431	AE003439	FBgn0029928															146	153987_at	UDP-glycosyltransferase 35a	Ugt35a	CT20642	AE003690	FBgn0026315
147	144778_at		CG12649	CT35297	AE003449	FBgn0030169															147	154010_at		BcDNA:LD21405	CT27236	AE003503	FBgn0027528
148	144985_at		CG4349	CT14212	AE003491	FBgn0030449															148	154129_at	rolling stone	rost	CT27002	AE003623	FBgn0011705
149	145025_at		CG12177	CT9165	AE003493	FBgn0030510															149	154134_at		methyl-CpG-binding-domain-like-protein	CT37347	AE003683	FBgn0027950
150	145424_at		CG11748	CT35531	AE003571	FBgn0031109															150	154442_at		CG7729	CT23519	AE003525	FBgn0036688
151	145477_at		CG12564	CT34320	AE003568	FBgn0031179															151	154444_at		CG6755	CT20983	AE003742	FBgn0039066
152	146012_at		CG8419	CT24715	AE003620	FBgn0031999															152	154513_at		CG3021	CT10176	AE003419	FBgn0029554
153	146172_at		CG7329	CT22593	AE003629	FBgn0032271															153	154546_at		CG6293	CT19686	AE003686	FBgn0037807
154	146180_at		CG17107	CT33651	AE003629	FBgn0032281															154	154671_at		CG10184	CT28655	AE003744	FBgn0039094
155	146182_at		CG7296	CT22519	AE003629	FBgn0032283															155	154707_at	Saccharomyces cerevisiae UAS construct a of Sotillos	B4	CT26270	AE003640	FBgn0023407
156	146214_at		CG16743	CT34737	AE003630	FBgn0032322															156	154723_at		CG11956	CT39158	AE003768	FBgn0039658
157	146226_at		CG14920	CT34747	AE003631	FBgn0032337															157	154936_at		CG9285	CT26455	AE003701	FBgn0038184
158	146392_at		CG4855	CT15595	AE003653	FBgn0032623															158	154938_at		CG1583	CT4181	AE003443	FBgn0030013
159	146870_at		CG2412	CT8006	AE003834	FBgn0033389															159	155159_at		CG15694	CT35895	AE003732	FBgn0038831
160	147228_at		CG10257	CT28823	AE003812	FBgn0033985
161	147272_at		CG8388	CT18261	AE003808	FBgn0034062
162	147315_at		CG4905	CT15621	AE003806	FBgn0034135
163	147413_at		CG5756	CT18091	AE003800	FBgn0034301
164	148704_at		CG14107	CT33701	AE003538	FBgn0036351
165	149134_at		CG17637	CT38927	AE003591	FBgn0037004
166	149201_at		CG7155	CT22117	AE003595	FBgn0037119
167	149215_at		CG7442	CT22915	AE003596	FBgn0037140
168	149899_at		Cyp313a1	CT11271	AE003705	FBgn0038236
169	149984_at		CG11846	CT36983	AE003710	FBgn0038379
170	150314_at		CG15503	CT35611	AE003734	FBgn0038888
171	150375_at		CG5326	CT16950	AE003739	FBgn0038983
172	150385_at		CG6949	CT21531	AE003739	FBgn0038996
173	150499_at		CG6356	CT19859	AE003747	FBgn0039178
174	150542_at		CG13647	CT33043	AE003750	FBgn0039256
175	150558_at		CG13653	CT33069	AE003751	FBgn0039288
176	150583_at		CG13660	CT33089	AE003751	FBgn0039320
177	150677_at		CG14249	CT33869	AE003757	FBgn0039447
178	150889_at		CG15537	CT35652	AE003774	FBgn0039770
179	151086_at		CG13643	CT33038	AE003749	FBgn0040601
180	151683_at		CG14648	CT3442		FBgn0037245
181	151801_at		CG12163	CT8855	AE003603	FBgn0037303
182	151855_at		BcDNA:GH02439	CT6664	AE003601	FBgn0027608
183	151905_at	Protein C kinase 53E	Pkc53E	CT20486	AE003805	FBgn0003091
184	151919_at		CG16941	CT37570	AE003715	FBgn0038464
185	151992_at		CG10233	CT28765	AE003603	FBgn0037302
186	152057_at		CG8324	CT4932	AE003784	FBgn0033071
187	152441_at		CG4744	CT15313	AE003818	FBgn0033834
188	152485_at		CG4961	CT15711	AE003728	FBgn0038770
189	152715_at		CG1600	CT37723	AE003840	FBgn0033188
190	152839_at		CG7388	CT13674	AE003557	FBgn0035818
191	152855_at		CG11546	CT9385	AE003838	FBgn0033270
192	153015_i_at		CG1055	CT1120	AE003605	FBgn0037269
193	153059_at		CG1136	CT1836	AE003480	FBgn0035490
194	153061_at		CG3872	CT12859	AE003465	FBgn0035055
195	153098_at		CG16705	CT37173	AE003744	FBgn0039102
196	153155_at	Saccharomyces cerevisiae UAS construct a of McKearin	TER94	CT7768	AE003831	FBgn0024923
197	153230_at	bobby sox	bbx	CT3330	AE003568	FBgn0024251
198	153256_at		CG3869	CT41324	AE003437	FBgn0029870
199	153260_at	Multiple inositol polyphosphate phosphatase 1	Mipp1	CT13676	AE003527	FBgn0026061
200	153282_at		CG6983	CT21627	AE003555	FBgn0035896
201	153385_at		CG4675	CT14838	AE003616	FBgn0031899
202	153417_at		CG5823	CT18279	AE003718	FBgn0038515
203	153725_at		CG3662	CT12281	AE003588	FBgn0031285
204	153784_at		a6	CT12608	AE003421	FBgn0023130
205	154150_at		CG8430	CT18945	AE003808	FBgn0034079
206	154158_at		CG3496	CT11785	AE003460	FBgn0034852
207	154290_at		CG11241	CT31379	AE003598	FBgn0037186
208	154450_at	abstrakt	abs	CT34409	AE003607	FBgn0015331
209	154655_at	lethal (2) 35Fe	l(2)35Fe	CT18240	AE003650	FBgn0001995
210	154853_at		CG5018	CT16106	AE003528	FBgn0036578
211	154871_at		CG11299	CT31531	AE003461	FBgn0034897
212	154946_at		CG5546	CT17568	AE003522	FBgn0036761
213	155049_at		CG7129	CT22037	AE003721	FBgn0038599
214	155145_at		CG4094	CT13458	AE003438	FBgn0029889
[truncated: 27 more columns]
